# Supplementary material for: Targeted Therapy-Resistant Melanoma Cells Acquire Transcriptomic Similarities with Human Melanoblasts
Source: MDPI journal article supplement (doi:10.3390/cancers10110451), 2018-11-16
Supplement: s1 [file s1]

## Supplementary materials: Targeted Therapy-Resistant Melanoma Cells Acquire Transcriptomic Similarities with Human Melanoblasts

**Lionel Larribère, Silke Kuphal, Christos Sachpekidis, Sachindra, Laura Hüser, Anja Bosserhoff  
and Jochen Utikal**

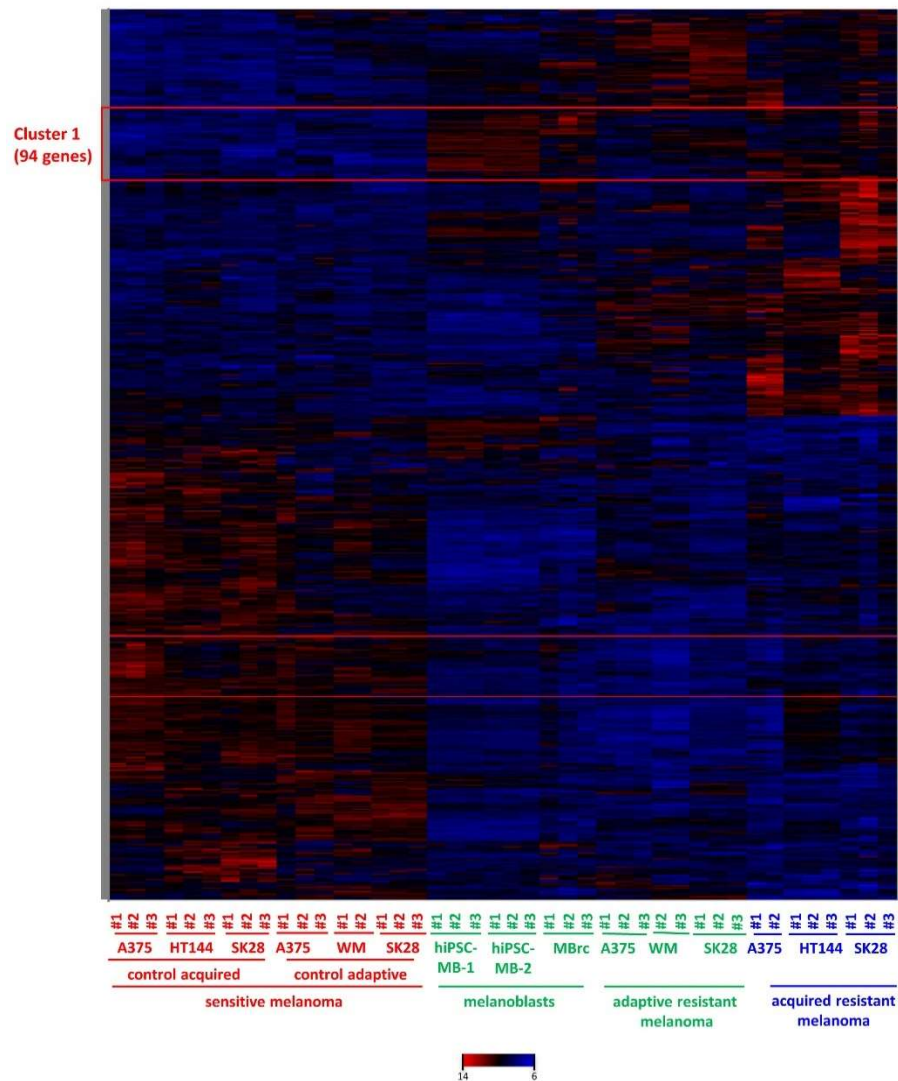

**Figure S1.** Gene clustering from melanoblast samples, sensitive, adaptive and acquired resistant melanoma samples. Cluster 1 represents upregulated gene in all melanoblast samples and all resistant melanoma samples.

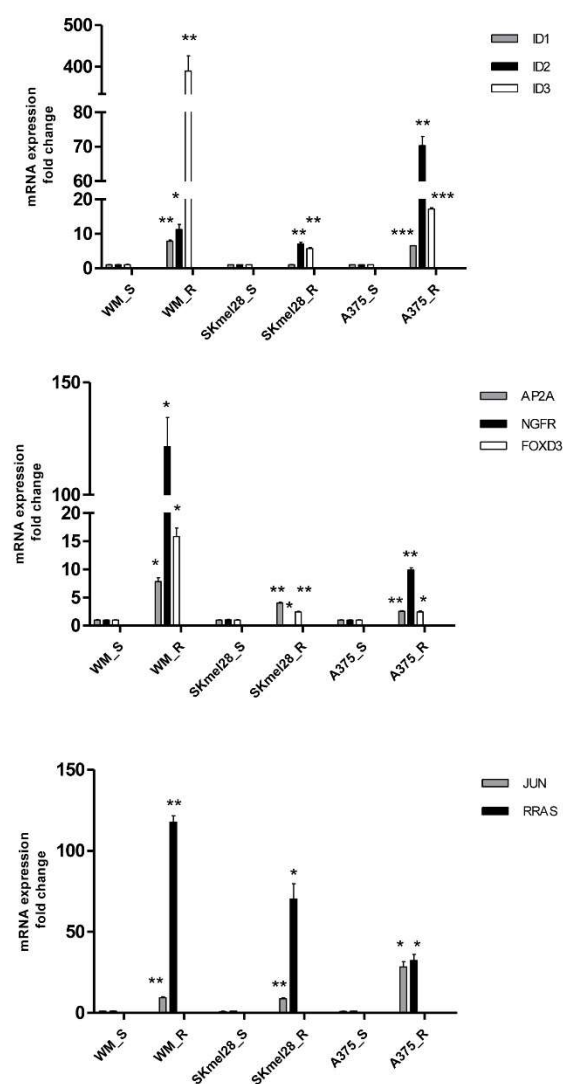

**Figure S2:** Real-time qPCR analysis of candidate genes' expression: *ID1*, *ID2*, *ID3*, *FOXD3*, *NGFR*, *JUN*, and *RRAS*, in sensitive and resistant melanoma cell lines A375, SKmel28, and WM266-4. Data represent a mean of three independent experiments  $\pm$  SEM.
